# Supplementary material for: An ab initio and TD-DFT study of solvent effect contributions to the electronic spectrum of Nile Red
Source: Royal Society of Chemistry journal article supplement (doi:10.1039/b902528f), 2009-01-01
Supplement: b902528f.pdf [file b902528f.pdf]

**Supporting information for**

**“An Ab Initio and TD-DFT study of Solvent Effects on the Electronic Spectra of Nile Red”**

Patrick Tuck, Robert Mawhinney, Mani Rappon

1. Optimized structures of Nile Red:

**A.** Title and model chemistry, **B.** energy (a.u.), **C.** Cartesian coordinates.

**A.** NR in gas phase rB3LYP/6-31+G(d)

**B.** -1032.95994748

**C.**

|   |             |             |             |
|---|-------------|-------------|-------------|
| C | 2.76164800  | -1.61269900 | -0.18483000 |
| C | 1.41976900  | -1.94317800 | -0.21421900 |
| C | 0.41626700  | -0.96159000 | -0.10036900 |
| C | 0.84635600  | 0.37393100  | 0.04287000  |
| C | 2.18257800  | 0.73576200  | 0.07137900  |
| C | 3.18791000  | -0.25707300 | -0.04035300 |
| C | -1.42050100 | 1.06400700  | 0.11498000  |
| C | -1.80214400 | -0.33995300 | -0.02600800 |
| C | -3.23817600 | -0.64637200 | -0.05102400 |
| C | -4.18455600 | 0.39817100  | 0.05431600  |
| C | -3.75115900 | 1.82227700  | 0.19316600  |
| C | -2.31799500 | 2.07796700  | 0.21672700  |
| H | 3.49038700  | -2.41009500 | -0.25422400 |
| H | 1.10883600  | -2.97885500 | -0.31817200 |
| H | 2.41671900  | 1.78892200  | 0.15851800  |
| H | -1.98719400 | 3.10633700  | 0.31958400  |
| O | -0.08454700 | 1.37209600  | 0.14727900  |
| N | -0.91583000 | -1.29611200 | -0.12847000 |
| N | 4.52438700  | 0.07440400  | -0.00816700 |
| C | 4.97487200  | 1.43863600  | 0.27445700  |
| H | 4.31163700  | 1.88960500  | 1.01993100  |
| H | 5.95694000  | 1.36311000  | 0.75530900  |
| C | 5.57585000  | -0.91382300 | -0.25804800 |
| H | 5.23907700  | -1.61421900 | -1.02912600 |
| H | 6.42625500  | -0.37756000 | -0.69461800 |
| C | 6.03460600  | -1.66891700 | 0.99699600  |
| H | 5.21142800  | -2.23175900 | 1.44926000  |
| H | 6.83523500  | -2.37441800 | 0.74300600  |
| H | 6.42170900  | -0.97556600 | 1.75261300  |

Supplementary Material (ESI) for *PCCP*

This journal is © the Owner Societies 2009

|   |             |             |             |
|---|-------------|-------------|-------------|
| C | 5.07945200  | 2.33180700  | -0.96928800 |
| H | 5.78279700  | 1.90981900  | -1.69654500 |
| H | 4.11020900  | 2.44374900  | -1.46609700 |
| H | 5.43920400  | 3.32957400  | -0.68983700 |
| O | -4.57459200 | 2.74051300  | 0.28475500  |
| C | -3.68813200 | -1.97335800 | -0.17977300 |
| C | -5.55498100 | 0.10063000  | 0.02927900  |
| C | -5.98851000 | -1.21491100 | -0.09803900 |
| H | -5.38625700 | -3.28239800 | -0.30217100 |
| C | -5.04977000 | -2.25342800 | -0.20260500 |
| H | -7.05217300 | -1.43818200 | -0.11661900 |
| H | -2.95424900 | -2.76831100 | -0.26011400 |
| H | -6.25766000 | 0.92402800  | 0.11181300  |

**A.** NR in Benzene rB3LYP/6-31+G(d)

**B.**

-1032.96891891

**C.**

|   |             |             |             |
|---|-------------|-------------|-------------|
| C | 2.76109100  | -1.61450800 | -0.18876500 |
| C | 1.42143500  | -1.94653000 | -0.21921700 |
| C | 0.41572400  | -0.96414300 | -0.10369900 |
| C | 0.84666800  | 0.37270600  | 0.04259300  |
| C | 2.18068900  | 0.73698000  | 0.07263600  |
| C | 3.18815100  | -0.25636800 | -0.04112100 |
| C | -1.42123700 | 1.05950100  | 0.11625800  |
| C | -1.80301000 | -0.34063700 | -0.02798400 |
| C | -3.23811700 | -0.64568200 | -0.05285100 |
| C | -4.18409900 | 0.40101100  | 0.05529000  |
| C | -3.74729300 | 1.82148100  | 0.19584100  |
| C | -2.31917500 | 2.07630600  | 0.22087800  |
| H | 3.48969600  | -2.41199900 | -0.26187900 |
| H | 1.11323500  | -2.98415800 | -0.32569200 |
| H | 2.41380300  | 1.79037300  | 0.16555100  |
| H | -1.98400800 | 3.10459300  | 0.32667300  |
| O | -0.08799500 | 1.36832000  | 0.14942300  |
| N | -0.91316500 | -1.29694400 | -0.13260300 |
| N | 4.52013400  | 0.07321400  | -0.00793700 |
| C | 4.97367700  | 1.44071100  | 0.26383300  |
| H | 4.30658100  | 1.90339600  | 0.99829900  |
| H | 5.95155200  | 1.36614300  | 0.75268300  |
| C | 5.57542800  | -0.91711300 | -0.24607900 |
| H | 5.24056300  | -1.63019700 | -1.00587500 |
| H | 6.42273100  | -0.38347700 | -0.69115800 |
| C | 6.03641200  | -1.64906700 | 1.02121400  |
| H | 5.21375700  | -2.20177100 | 1.48734500  |
| H | 6.83341100  | -2.36141700 | 0.77544600  |
| H | 6.42960000  | -0.94247000 | 1.76123700  |

Supplementary Material (ESI) for *PCCP*

This journal is © the Owner Societies 2009

|   |             |             |             |
|---|-------------|-------------|-------------|
| C | 5.09100900  | 2.31519900  | -0.99146300 |
| H | 5.80084400  | 1.88184900  | -1.70561600 |
| H | 4.12622900  | 2.42299100  | -1.49836300 |
| H | 5.45002600  | 3.31560700  | -0.72092100 |
| O | -4.57354900 | 2.74467900  | 0.29367600  |
| C | -3.69169400 | -1.97189500 | -0.18370100 |
| C | -5.55562500 | 0.10322600  | 0.03063600  |
| C | -5.99171300 | -1.21134400 | -0.09878600 |
| H | -5.39130300 | -3.28047000 | -0.30731600 |
| C | -5.05373700 | -2.25096500 | -0.20603700 |
| H | -7.05672900 | -1.43295000 | -0.11692100 |
| H | -2.96149400 | -2.77113300 | -0.26629000 |
| H | -6.26242500 | 0.92399600  | 0.11492900  |

**A.** NR in Acetonitrile rB3LYP/6-31+G(d)

**B.**

-1032.98199856

**C.**

|   |             |             |             |
|---|-------------|-------------|-------------|
| C | 2.76396500  | -1.61436700 | -0.19205100 |
| C | 1.42818200  | -1.94952000 | -0.22316300 |
| C | 0.41790200  | -0.96653700 | -0.10409200 |
| C | 0.84969800  | 0.37342500  | 0.04847600  |
| C | 2.17986800  | 0.74185100  | 0.08054300  |
| C | 3.19085900  | -0.25178600 | -0.03921400 |
| C | -1.41988700 | 1.05230100  | 0.12713900  |
| C | -1.80099600 | -0.34026000 | -0.02692900 |
| C | -3.23337300 | -0.64514800 | -0.05761700 |
| C | -4.17988800 | 0.40368400  | 0.05937300  |
| C | -3.73947800 | 1.81760400  | 0.21485600  |
| C | -2.32000300 | 2.07287000  | 0.24124100  |
| H | 3.49265900  | -2.41200600 | -0.27565400 |
| H | 1.12518300  | -2.99009700 | -0.33568800 |
| H | 2.40920600  | 1.79613000  | 0.18702000  |
| H | -1.97697400 | 3.09991400  | 0.35514100  |
| O | -0.09097300 | 1.36348300  | 0.16166100  |
| N | -0.90408800 | -1.29694500 | -0.13626600 |
| N | 4.51639200  | 0.07570900  | -0.00784400 |
| C | 4.97388200  | 1.45251800  | 0.22332500  |
| H | 4.31235700  | 1.93930100  | 0.94687700  |
| H | 5.95517800  | 1.38819300  | 0.70591800  |
| C | 5.57729300  | -0.92089800 | -0.21337400 |
| H | 5.25714100  | -1.64747700 | -0.96638500 |
| H | 6.43129800  | -0.39144600 | -0.64944000 |
| C | 6.01126800  | -1.62604700 | 1.07764800  |
| H | 5.18556000  | -2.19081700 | 1.52422900  |
| H | 6.82873700  | -2.32515300 | 0.86372600  |
| H | 6.36839900  | -0.90140200 | 1.81859000  |

Supplementary Material (ESI) for *PCCP*

This journal is © the Owner Societies 2009

|   |             |             |             |
|---|-------------|-------------|-------------|
| C | 5.08349000  | 2.28222000  | -1.06206500 |
| H | 5.78114800  | 1.81840000  | -1.76908100 |
| H | 4.11246100  | 2.38420000  | -1.55879000 |
| H | 5.45533400  | 3.28670300  | -0.82659400 |
| O | -4.57259100 | 2.74743300  | 0.31919300  |
| C | -3.69093500 | -1.96988300 | -0.20290200 |
| C | -5.55305100 | 0.10451400  | 0.02850200  |
| C | -5.99126500 | -1.20779300 | -0.11539000 |
| H | -5.39175800 | -3.27740300 | -0.34428800 |
| C | -5.05325700 | -2.24778400 | -0.23136600 |
| H | -7.05802700 | -1.42810500 | -0.13817800 |
| H | -2.96512500 | -2.77414900 | -0.29260800 |
| H | -6.26603600 | 0.92075500  | 0.11950500  |

**A.** NR in Mix1 rB3LYP/6-31+G(d)

**B.**

-1032.97467975

**C.**

|   |             |             |             |
|---|-------------|-------------|-------------|
| C | 2.76241700  | -1.61434200 | -0.18923200 |
| C | 1.42449700  | -1.94816500 | -0.21934900 |
| C | 0.41684900  | -0.96551100 | -0.10292300 |
| C | 0.84778700  | 0.37276400  | 0.04452300  |
| C | 2.18008200  | 0.73928300  | 0.07537000  |
| C | 3.18935600  | -0.25414100 | -0.03985200 |
| C | -1.42099900 | 1.05607200  | 0.12005300  |
| C | -1.80229800 | -0.34128900 | -0.02662600 |
| C | -3.23664900 | -0.64550600 | -0.05394600 |
| C | -4.18267000 | 0.40239700  | 0.05697300  |
| C | -3.74401300 | 1.81998300  | 0.20326900  |
| C | -2.31957500 | 2.07470800  | 0.22754900  |
| H | 3.49088600  | -2.41177800 | -0.26707800 |
| H | 1.11903100  | -2.98750500 | -0.32728500 |
| H | 2.41152600  | 1.79301300  | 0.17394700  |
| H | -1.98108100 | 3.10292600  | 0.33511500  |
| O | -0.08978100 | 1.36602700  | 0.15312200  |
| N | -0.90950800 | -1.29757700 | -0.13253400 |
| N | 4.51843200  | 0.07478200  | -0.00762100 |
| C | 4.97422100  | 1.44521600  | 0.25164000  |
| H | 4.30819800  | 1.91693100  | 0.98101000  |
| H | 5.95230700  | 1.37326700  | 0.74019800  |
| C | 5.57669100  | -0.91673500 | -0.23641600 |
| H | 5.24935200  | -1.63136300 | -0.99783600 |
| H | 6.42729200  | -0.38227200 | -0.67373500 |
| C | 6.02522700  | -1.64433900 | 1.03752000  |
| H | 5.20694300  | -2.22302300 | 1.47957800  |
| H | 6.84649300  | -2.33323800 | 0.80547600  |
| H | 6.38196100  | -0.93224400 | 1.79064900  |
| C | 5.09183400  | 2.30392900  | -1.01418500 |

Supplementary Material (ESI) for *PCCP*

This journal is © the Owner Societies 2009

|   |             |             |             |
|---|-------------|-------------|-------------|
| H | 5.78539000  | 1.85055500  | -1.73190600 |
| H | 4.12257300  | 2.42536500  | -1.50978200 |
| H | 5.47243500  | 3.29976000  | -0.75678200 |
| O | -4.57274400 | 2.74689200  | 0.30044100  |
| C | -3.69258000 | -1.97094300 | -0.19023900 |
| C | -5.55503700 | 0.10432500  | 0.02950200  |
| C | -5.99262000 | -1.20922700 | -0.10539900 |
| H | -5.39299400 | -3.27901800 | -0.32106900 |
| C | -5.05484700 | -2.24931500 | -0.21536800 |
| H | -7.05858800 | -1.42989500 | -0.12570100 |
| H | -2.96493500 | -2.77314100 | -0.27519600 |
| H | -6.26509700 | 0.92288500  | 0.11578900  |

**A.** NR in gas phase rHF/6-31+G(d)

**B.**

-1026.49037649

**C.**

|   |             |             |             |
|---|-------------|-------------|-------------|
| C | 2.73809500  | -1.60465300 | -0.16719700 |
| C | 1.40136400  | -1.92479000 | -0.19664200 |
| C | 0.41599500  | -0.94766300 | -0.09292300 |
| C | 0.83906100  | 0.36492500  | 0.04018200  |
| C | 2.16923000  | 0.72374100  | 0.06704100  |
| C | 3.16449200  | -0.26119600 | -0.03547000 |
| C | -1.39568200 | 1.07142000  | 0.11317700  |
| C | -1.78906700 | -0.34531600 | -0.02595700 |
| C | -3.23780000 | -0.64341000 | -0.05132300 |
| C | -4.16540100 | 0.39199300  | 0.05268100  |
| C | -3.71993700 | 1.81253800  | 0.19090200  |
| C | -2.27683900 | 2.06607300  | 0.21269600  |
| H | 3.45193100  | -2.39985800 | -0.22957500 |
| H | 1.09515700  | -2.95068800 | -0.29342500 |
| H | 2.39875300  | 1.76583200  | 0.14912700  |
| H | -1.95357000 | 3.08474800  | 0.31263300  |
| O | -0.08031800 | 1.35347000  | 0.13934700  |
| N | -0.93035200 | -1.27215400 | -0.12079200 |
| N | 4.49595500  | 0.06716700  | -0.00705400 |
| C | 4.94798400  | 1.41848400  | 0.28308700  |
| H | 4.29760200  | 1.86794800  | 1.02238300  |
| H | 5.92019000  | 1.33983700  | 0.75625400  |
| C | 5.53810400  | -0.91104200 | -0.27526000 |
| H | 5.20008800  | -1.60530700 | -1.03354000 |
| H | 6.37412000  | -0.37989200 | -0.71591800 |
| C | 6.01856400  | -1.66327800 | 0.96596200  |
| H | 5.21322300  | -2.21936600 | 1.43213300  |
| H | 6.80634200  | -2.36314600 | 0.70066600  |
| H | 6.41684300  | -0.97616200 | 1.70581500  |
| C | 5.05975800  | 2.31538900  | -0.95016600 |
| H | 5.76093900  | 1.90173900  | -1.66815400 |
| H | 4.10450900  | 2.42911700  | -1.44967200 |

Supplementary Material (ESI) for *PCCP*

This journal is © the Owner Societies 2009

|   |             |             |             |
|---|-------------|-------------|-------------|
| H | 5.41430000  | 3.30248600  | -0.66647600 |
| O | -4.51266600 | 2.71172400  | 0.28097100  |
| C | -3.68794800 | -1.95805400 | -0.17933900 |
| C | -5.52999500 | 0.11118100  | 0.02850700  |
| C | -5.96812700 | -1.19120700 | -0.09824500 |
| H | -5.38084600 | -3.24228500 | -0.30108200 |
| C | -5.04152400 | -2.22652900 | -0.20222000 |
| H | -7.02136900 | -1.40659400 | -0.11672500 |
| H | -2.97114200 | -2.75209000 | -0.25916900 |
| H | -6.22439900 | 0.92540700  | 0.11014900  |

**A.** NR in Benzene rHF/6-31+G(d)

**B.**

-1026.49883230

**C.**

|   |             |             |             |
|---|-------------|-------------|-------------|
| C | 2.73967200  | -1.60473300 | -0.17223700 |
| C | 1.40419800  | -1.92641500 | -0.20275100 |
| C | 0.41708700  | -0.94914800 | -0.09625900 |
| C | 0.84035000  | 0.36338400  | 0.04108400  |
| C | 2.16909900  | 0.72504700  | 0.06992000  |
| C | 3.16668500  | -0.25957400 | -0.03605200 |
| C | -1.39487600 | 1.06804500  | 0.11666300  |
| C | -1.78879300 | -0.34649800 | -0.02726800 |
| C | -3.23722200 | -0.64349900 | -0.05358000 |
| C | -4.16424500 | 0.39355100  | 0.05451200  |
| C | -3.71506500 | 1.81067200  | 0.19746000  |
| C | -2.27622500 | 2.06462000  | 0.21990900  |
| H | 3.45326000  | -2.40010800 | -0.23907000 |
| H | 1.10069200  | -2.95405300 | -0.30317400 |
| H | 2.39703400  | 1.76741300  | 0.15839400  |
| H | -1.95021400 | 3.08354000  | 0.32345100  |
| O | -0.08225200 | 1.35024600  | 0.14391800  |
| N | -0.92799800 | -1.27230400 | -0.12519400 |
| N | 4.49473200  | 0.06787500  | -0.00704800 |
| C | 4.94816400  | 1.42334500  | 0.26825200  |
| H | 4.29913300  | 1.88277200  | 1.00256500  |
| H | 5.92052300  | 1.34837400  | 0.74101100  |
| C | 5.53968300  | -0.91377800 | -0.26002100 |
| H | 5.20839600  | -1.61472600 | -1.01503600 |
| H | 6.37851500  | -0.38529000 | -0.69777300 |
| C | 6.00914600  | -1.65378400 | 0.99232000  |
| H | 5.20054700  | -2.20838000 | 1.45513800  |
| H | 6.80053200  | -2.35415800 | 0.73966600  |
| H | 6.39921200  | -0.95904100 | 1.72948500  |
| C | 5.05971700  | 2.30333600  | -0.97680300 |
| H | 5.75874000  | 1.87829300  | -1.69026100 |
| H | 4.10334800  | 2.41386100  | -1.47543800 |
| H | 5.41721800  | 3.29284100  | -0.70566400 |
| O | -4.50972400 | 2.71412400  | 0.29162100  |

Supplementary Material (ESI) for *PCCP*

This journal is © the Owner Societies 2009

|   |             |             |             |
|---|-------------|-------------|-------------|
| C | -3.69017200 | -1.95684700 | -0.18612900 |
| C | -5.52959000 | 0.11354800  | 0.02974200  |
| C | -5.97030400 | -1.18800200 | -0.10157600 |
| H | -5.38503200 | -3.24001600 | -0.31209400 |
| C | -5.04466700 | -2.22402800 | -0.20959300 |
| H | -7.02479600 | -1.40161100 | -0.12041700 |
| H | -2.97681800 | -2.75471900 | -0.26928800 |
| H | -6.22745800 | 0.92559600  | 0.11432200  |

**A.** NR in Acetonitrile rHF/6-31+G(d)

**B.**

-1026.51072461

**C.**

|   |             |             |             |
|---|-------------|-------------|-------------|
| C | 2.74177600  | -1.60537400 | -0.17853600 |
| C | 1.40779700  | -1.92903400 | -0.21051600 |
| C | 0.41834500  | -0.95128900 | -0.10090800 |
| C | 0.84189800  | 0.36147900  | 0.04117800  |
| C | 2.16880900  | 0.72693200  | 0.07223500  |
| C | 3.16935300  | -0.25766900 | -0.03718200 |
| C | -1.39333500 | 1.06336400  | 0.12154900  |
| C | -1.78821300 | -0.34763500 | -0.02984200 |
| C | -3.23593100 | -0.64332300 | -0.05803700 |
| C | -4.16191700 | 0.39584700  | 0.05837300  |
| C | -3.70752500 | 1.80764700  | 0.21121800  |
| C | -2.27529100 | 2.06264200  | 0.23261400  |
| H | 3.45449800  | -2.40187800 | -0.25247900 |
| H | 1.10838600  | -2.95933000 | -0.31592500 |
| H | 2.39355300  | 1.77033900  | 0.16969900  |
| H | -1.94439200 | 3.08144500  | 0.34228900  |
| O | -0.08472200 | 1.34589100  | 0.14844700  |
| N | -0.92455800 | -1.27225500 | -0.13174100 |
| N | 4.49315300  | 0.06880700  | -0.00709200 |
| C | 4.94806000  | 1.43121100  | 0.24006900  |
| H | 4.29955600  | 1.90903500  | 0.96298800  |
| H | 5.92051200  | 1.36463000  | 0.71319200  |
| C | 5.54232000  | -0.91857500 | -0.23136500 |
| H | 5.22174100  | -1.63363300 | -0.97759000 |
| H | 6.38624300  | -0.39615000 | -0.66578300 |
| C | 5.99322000  | -1.63413700 | 1.04137500  |
| H | 5.17901600  | -2.18497100 | 1.49960100  |
| H | 6.79049200  | -2.33588900 | 0.81253600  |
| H | 6.36945600  | -0.92443800 | 1.77158700  |
| C | 5.05988700  | 2.27956600  | -1.02636700 |
| H | 5.75590300  | 1.83399500  | -1.73024300 |
| H | 4.10180200  | 2.38295400  | -1.52406500 |
| H | 5.42188200  | 3.27360900  | -0.77897700 |
| O | -4.50570800 | 2.71649700  | 0.31557900  |
| C | -3.69275100 | -1.95468500 | -0.20018500 |

Supplementary Material (ESI) for *PCCP*

This journal is © the Owner Societies 2009

|   |             |             |             |
|---|-------------|-------------|-------------|
| C | -5.52854200 | 0.11704900  | 0.03220900  |
| C | -5.97282200 | -1.18290400 | -0.10876200 |
| H | -5.39061200 | -3.23599800 | -0.33536400 |
| C | -5.04852800 | -2.21985300 | -0.22515100 |
| H | -7.02918900 | -1.39437300 | -0.12864800 |
| H | -2.98417000 | -2.75788700 | -0.29011100 |
| H | -6.23105500 | 0.92600600  | 0.12311100  |

**A.** NR in Mix1 rHF/6-31+G(d)

**B.**

-1026.50414470

**C.**

|   |             |             |             |
|---|-------------|-------------|-------------|
| C | 2.74050700  | -1.60437500 | -0.17600500 |
| C | 1.40579700  | -1.92708700 | -0.20746400 |
| C | 0.41751000  | -0.94976300 | -0.09941600 |
| C | 0.84081000  | 0.36284500  | 0.04020500  |
| C | 2.16869700  | 0.72636200  | 0.07053400  |
| C | 3.16781700  | -0.25814700 | -0.03671300 |
| C | -1.39464000 | 1.06616000  | 0.11733100  |
| C | -1.78887200 | -0.34700300 | -0.02897100 |
| C | -3.23701400 | -0.64351000 | -0.05496800 |
| C | -4.16361200 | 0.39462400  | 0.05546600  |
| C | -3.71217000 | 1.80970700  | 0.20000600  |
| C | -2.27621400 | 2.06407200  | 0.22255500  |
| H | 3.45388600  | -2.39992300 | -0.24555100 |
| H | 1.10423100  | -2.95593500 | -0.31015400 |
| H | 2.39523400  | 1.76905500  | 0.16305600  |
| H | -1.94819000 | 3.08310800  | 0.32798500  |
| O | -0.08379300 | 1.34844300  | 0.14506500  |
| N | -0.92665500 | -1.27214200 | -0.12870400 |
| N | 4.49399500  | 0.06834400  | -0.00606000 |
| C | 4.94915500  | 1.42556500  | 0.26211200  |
| H | 4.29950000  | 1.89136700  | 0.99168000  |
| H | 5.92047200  | 1.35189900  | 0.73693400  |
| C | 5.54047300  | -0.91514500 | -0.25104800 |
| H | 5.21331800  | -1.61906800 | -1.00497100 |
| H | 6.38150600  | -0.38792600 | -0.68575700 |
| C | 6.00192900  | -1.64977400 | 1.00718800  |
| H | 5.18688000  | -2.19092000 | 1.47494700  |
| H | 6.78408800  | -2.36199300 | 0.75912800  |
| H | 6.40160300  | -0.95350800 | 1.73778100  |
| C | 5.06375600  | 2.29567800  | -0.98937300 |
| H | 5.76400100  | 1.86471900  | -1.69806700 |
| H | 4.10789500  | 2.40346100  | -1.49002700 |
| H | 5.42130400  | 3.28682500  | -0.72445500 |
| O | -4.50836100 | 2.71565400  | 0.29771900  |
| C | -3.69169400 | -1.95622800 | -0.18918000 |
| C | -5.52950400 | 0.11501900  | 0.03138600  |



|   |             |             |             |
|---|-------------|-------------|-------------|
| C | -5.97179300 | -1.18611200 | -0.10157000 |
| H | -5.38785200 | -3.23895100 | -0.31574100 |
| C | -5.04675200 | -2.22267400 | -0.21194900 |
| H | -7.02711500 | -1.39881700 | -0.11984400 |
| H | -2.98049300 | -2.75657500 | -0.27424700 |
| H | -6.22954900 | 0.92572200  | 0.11762300  |

## 2. PCM Solvent Specifications

Table of solvent parameters used in the PCM model.

| <b>Mixture</b>                   | <b>EPS (<math>\epsilon</math>)</b> | <b>EPSINF</b> | <b>RSOLV</b> |
|----------------------------------|------------------------------------|---------------|--------------|
| Gas Phase                        | N/A                                | N/A           | N/A          |
| Benzene<br>(default values)      | 2.247                              | 2.244         | 2.630        |
| Binary Mix 1                     | 4.520                              | 2.215         | 2.599        |
| Binary Mix 2                     | 12.496                             | 2.113         | 2.488        |
| Binary Mix 3                     | 20.508                             | 2.011         | 2.378        |
| Binary Mix 4                     | 22.526                             | 1.986         | 2.350        |
| Binary Mix 5                     | 28.082                             | 1.915         | 2.273        |
| Binary Mix 6                     | 33.171                             | 1.850         | 2.203        |
| Acetonitrile<br>(default values) | 36.640                             | 1.806         | 2.155        |

Figure S1. Comparison of the relationships between the dielectric constant for the various solvent mixtures and the mole fraction of acetonitrile.

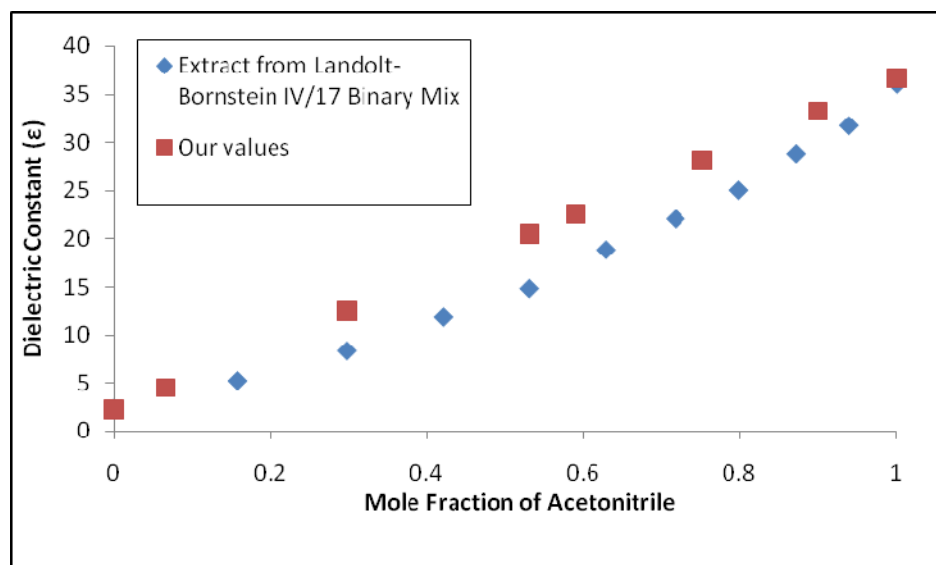

### 3. Experimental Emission Values

| Solvent ( $\epsilon$ )      | $\lambda_{em-CIS}$ | $\lambda_{em\ exp't.}^{\ddagger}$ | $\lambda_{em\ exp't} - \lambda_{em-CIS}$ |
|-----------------------------|--------------------|-----------------------------------|------------------------------------------|
| Gas Phase (0)               | 308                | N/A                               | N/A                                      |
| Benzene (2.247)             | 371                | 570                               | 199                                      |
| Binary Mixture 1<br>(4.52)  | 376                | 584                               | 208                                      |
| Binary Mixture 2<br>(12.50) | 379                | 598                               | 219                                      |
| Binary Mixture 3<br>(20.51) | 379                | 604                               | 225                                      |
| Binary Mixture 4<br>(22.53) | 379                | 607                               | 228                                      |

|                             |     |     |     |
|-----------------------------|-----|-----|-----|
| Binary Mixture 5<br>(28.08) | 378 | 609 | 231 |
| Binary Mixture 6<br>(33.17) | 378 | 609 | 231 |
| Acetonitrile (36.64)        | 377 | 609 | 232 |

‡Experimental solvent/mixtures were measured using a luminescence spectrometer.
